# Supplementary material for: Prevalence and Predictors of Depression in Adults Aged 80 Years and Older in Primary Care: A Cross-Sectional Study
Source: Research Square preprint supplement (doi:10.21203/rs.3.rs-7967174/v1), 2025-11-28
Supplement: Supplementary file 1 [file 3a0dd3cb26830b7ec1b11d57.pdf]

# **Prevalence and Predictors of Depression in Adults Aged 80 Years and Older in Primary Care: A Cross-Sectional Study**

## Section 1: Sociodemographic Information

1. What is your age? .....

2. Gender

☐Female

☐Male

3. What is your education level?

☐Illiterate

☐Primary school

☐Middle school

☐High school

☐College/University

4. Family and Social Life

☐Alone

☐With spouse

☐With children

5. Economic Situation

☐Poor

☐Moderate

☐Good

6. What type of residence do you live in?

☐Detached house

☐Apartment

7. History of falls in past 12 months

☐ No

☐ Yes

8. Weight loss

☐ No

☐ Yes

9. Forgetfulness

☐ No

☐ Yes

10. Sleep disturbance

☐ No

☐ Yes

11. Vision Problems

☐ No

☐ Yes

12. Hearing Problem

☐ No

☐ Yes

13. Incontinence

☐ No

☐ Yes

**Section 2:** Characteristics of participants' chronic diseases and drug use

1. Number of medicines used (...../number)

2. Number of Chronic disease (...../number)

3. Hypertension

☐ No

☐ Yes

4. Diabetes

☐ No

☐ Yes

5. CHF, CAD, arrhythmia, dyslipidemia

☐ No

☐ Yes

**Section 3.** Geriatric Depression Scale (Long Form)

# Geriatric Depression Scale (Long Form)

Patient's Name: \_\_\_\_\_

Date: \_\_\_\_\_

**Instructions: Choose the best answer for how you felt over the past week.**

| No.          | Question                                                                   | Answer   | Score |
|--------------|----------------------------------------------------------------------------|----------|-------|
| 1.           | Are you basically satisfied with your life?                                | YES / NO |       |
| 2.           | Have you dropped many of your activities and interests?                    | YES / NO |       |
| 3.           | Do you feel that your life is empty?                                       | YES / NO |       |
| 4.           | Do you often get bored?                                                    | YES / NO |       |
| 5.           | Are you hopeful about the future?                                          | YES / NO |       |
| 6.           | Are you bothered by thoughts you can't get out of your head?               | YES / NO |       |
| 7.           | Are you in good spirits most of the time?                                  | YES / NO |       |
| 8.           | Are you afraid that something bad is going to happen to you?               | YES / NO |       |
| 9.           | Do you feel happy most of the time?                                        | YES / NO |       |
| 10.          | Do you often feel helpless?                                                | YES / NO |       |
| 11.          | Do you often get restless and fidgety?                                     | YES / NO |       |
| 12.          | Do you prefer to stay at home, rather than going out and doing new things? | YES / NO |       |
| 13.          | Do you frequently worry about the future?                                  | YES / NO |       |
| 14.          | Do you feel you have more problems with memory than most?                  | YES / NO |       |
| 15.          | Do you think it is wonderful to be alive now?                              | YES / NO |       |
| 16.          | Do you often feel downhearted and blue?                                    | YES / NO |       |
| 17.          | Do you feel pretty worthless the way you are now?                          | YES / NO |       |
| 18.          | Do you worry a lot about the past?                                         | YES / NO |       |
| 19.          | Do you find life very exciting?                                            | YES / NO |       |
| 20.          | Is it hard for you to get started on new projects?                         | YES / NO |       |
| 21.          | Do you feel full of energy?                                                | YES / NO |       |
| 22.          | Do you feel that your situation is hopeless?                               | YES / NO |       |
| 23.          | Do you think that most people are better off than you are?                 | YES / NO |       |
| 24.          | Do you frequently get upset over little things?                            | YES / NO |       |
| 25.          | Do you frequently feel like crying?                                        | YES / NO |       |
| 26.          | Do you have trouble concentrating?                                         | YES / NO |       |
| 27.          | Do you enjoy getting up in the morning?                                    | YES / NO |       |
| 28.          | Do you prefer to avoid social gatherings?                                  | YES / NO |       |
| 29.          | Is it easy for you to make decisions?                                      | YES / NO |       |
| 30.          | Is your mind as clear as it used to be?                                    | YES / NO |       |
| <b>TOTAL</b> |                                                                            |          |       |

This is the original scoring for the scale: One point for each of these answers.

Cutoff: normal-0-9; mild depressives-10-19; severe depressives-20-30.

|        |         |         |         |         |         |
|--------|---------|---------|---------|---------|---------|
| 1. NO  | 6. YES  | 11. YES | 16. YES | 21. NO  | 26. YES |
| 2. YES | 7. NO   | 12. YES | 17. YES | 22. YES | 27. NO  |
| 3. YES | 8. YES  | 13. YES | 18. YES | 23. YES | 28. YES |
| 4. YES | 9. NO   | 14. YES | 19. NO  | 24. YES | 29. NO  |
| 5. NO  | 10. YES | 15. NO  | 20. YES | 25. YES | 30. NO  |

Yesavage JA, Brink TL, Rose TL, et al. Development and validation of a geriatric depression screening scale: a preliminary report. *J Psychiatr Res* 1983; 17:37-49.

Provided courtesy of CME Outfitters, LLC

Available for download at [www.neuroscienceCME.com](http://www.neuroscienceCME.com)
